# Supplementary material for: Dual RNA-seq of maize and H. seropedicae ZAE94 association, in different doses of nitrate, reveals novel insights into Plant-PGPB-environment relationship
Source: Front Plant Sci. 2024 Mar 13;15:1346523. doi: 10.3389/fpls.2024.1346523 (PMC10965572; doi:10.3389/fpls.2024.1346523)
Supplement: Supplementary file 12 [file Table_9.xlsx]

## Sheet: Table S6
Table S9. Differentially expressed genes from maize involved in cell wall when inoculated with Herbaspirillum seropedicae (IN) or mock-inoculated (CT) and cultivated in 0.3 mM (N-) or 3 mM (N+) of nitrate. The DEGs cell wall genes was identified by homology analysis with Cell Wall Genomics Database (https://cellwall.genomics.purdue.edu/) and CAZy database (http://www.cazy.org).
Maize_ID locus Name	CTN+ vs CTN-	INN+ vs CTN+	INN- vs CTN-	Phytozome_info			Genomics_and_CAZy_Info	Figure 6
	log2FC	log2FC	log2FC	A. thaliana access	arabi-symbol	short description	Pathway	Gene symbol
Zm00001d022621	-1.96392	1.83928	-1.98474	AT4G38590.1	BGAL14	beta-galactosidase 14	ß-Galactosidase	BGAL14
Zm00001d024753	-2.35497	2.82029	-2.26962	AT4G11290.1	0	Peroxidase superfamily protein	Peroxidases	PRD_1
Zm00001d005607	3.15869	-4.55242		AT5G48930.1	HCT	hydroxycinnamoyl-CoA shikimate/quinate hydroxycinnamoyl transferase	Pathways of phenylpropanoid biosynthesis	HCT_1
Zm00001d014341	3.32095			AT5G06730.1	0	Peroxidase superfamily protein	Peroxidases	PRD_2
Zm00001d019560	1.64732			AT2G45110.1	ATEXPB4,ATHEXP BETA 1.1,EXPB4	expansin B4	Expansins	EXPB4
Zm00001d039770	1.90749			AT5G03170.1	ATFLA11,FLA11	FASCICLIN-like arabinogalactan-protein 11	Arabinogalactan-proteins (AGPs)	FLA11
Zm00001d044648	1.38576			AT3G10740.1	ARAF,ARAF1,ASD1,ATASD1	alpha-L-arabinofuranosidase 1	0
Zm00001d015899	-4.20186			AT2G24450.1	FLA3	FASCICLIN-like arabinogalactan protein 3 precursor	Arabinogalactan-proteins (AGPs)	FLA3
Zm00001d003817	2.71061	-3.17978		AT5G03650.1	SBE2.2	starch branching enzyme 2.2	0
Zm00001d004448	1.71918			AT4G13710.1	0	Pectin lyase-like superfamily protein	Pectate and pectin Lyases	Pectin lyase_1
Zm00001d004626	1.77171	-2.04165		AT1G78060.1	0	Glycosyl hydrolase family protein	0
Zm00001d006399	-2.38659		-3.19785	AT3G55500.1	ATEXP16,ATEXPA16,ATHEXP ALPHA 1.7,EXP16,EXPA16	expansin A16	Expansins	EXP16
Zm00001d009016	1.6862	-2.12906		AT4G17090.1	BAM3,BMY8,CT-BMY	chloroplast beta-amylase	0
Zm00001d009140	-2.55429	2.98601		AT5G06730.1	0	Peroxidase superfamily protein	Peroxidases	PRD_3
Zm00001d010079	1.42953			AT2G39980.1	0	HXXXD-type acyl-transferase family protein	Pathways of phenylpropanoid biosynthesis	Acyl-transferase_1
Zm00001d012036	4.85027	-4.53924		AT1G04920.1	ATSPS3F,SPS3F	sucrose phosphate synthase 3F	0
Zm00001d015200	2.23605			AT5G39790.1	0	5\'-AMP-activated protein kinase-related	0
Zm00001d016182	2.82039			AT5G05340.1	0	Peroxidase superfamily protein	Peroxidases	PRD_4
Zm00001d017092	4.51881	-4.24813		AT4G20360.1	ATRAB8D,ATRABE1B,RABE1b	RAB GTPase homolog E1B	Endocytosis	RAB8D
Zm00001d019479	2.87673	-3.07335		AT1G32900.1	0	UDP-Glycosyltransferase superfamily protein	0
Zm00001d020531	1.40513			AT5G17420.1	ATCESA7,CESA7,IRX3,MUR10	Cellulose synthase family protein	Cellulose syntase genes	CESA7
Zm00001d021653	3.84796	-3.06952		AT1G61800.1	ATGPT2,GPT2	glucose-6-phosphate/phosphate translocator 2	0
Zm00001d021702	1.98821	-1.73504		AT4G15210.1	AT-BETA-AMY,ATBETA-AMY,BAM5,BMY1,RAM1	beta-amylase 5	0
Zm00001d021736	2.66497			AT3G03050.1	ATCSLD3,CSLD3,KJK	cellulose synthase-like D3	Cellulose syntase Like	CSLD3
Zm00001d022059	2.25353			AT1G18650.1	PDCB3	plasmodesmata callose-binding protein 3	0
Zm00001d022453	-3.8371	2.87483	-1.51563	AT5G05340.1	0	Peroxidase superfamily protein	Peroxidases	PRD_5
Zm00001d024314	4.97985	-4.49823		AT4G37970.1	ATCAD6,CAD6	cinnamyl alcohol dehydrogenase 6	Pathways of phenylpropanoid biosynthesis	CAD6
Zm00001d024531	1.74173			AT5G16910.1	ATCSLD2,CSLD2	cellulose-synthase like D2	Cellulose syntase Like	CSLD2
Zm00001d024789	-2.35703			AT5G17540.1	0	HXXXD-type acyl-transferase family protein	Pathways of phenylpropanoid biosynthesis	Acyl-transferase_2
Zm00001d025588	-1.69243			AT5G49180.1	0	Plant invertase/pectin methylesterase inhibitor superfamily	Pectin methyl esterases	Methylesterase_1
Zm00001d025670	2.65916	-3.16995		AT4G26690.1	GPDL2,MRH5,SHV3	PLC-like phosphodiesterase family protein	GLPD	GPDL2
Zm00001d025764	-2.95595			AT1G65610.1	ATGH9A2,KOR2	Six-hairpin glycosidases superfamily protein	Glycoside hydrolase family 9	GH9A2
Zm00001d026577	-1.80307	1.79901		AT5G43060.1	0	Granulin repeat cysteine protease family protein	Proteases	Proteases_1
Zm00001d027309	1.71133			AT3G52180.1	ATPTPKIS1,ATSEX4,DSP4,SEX4	dual specificity protein phosphatase (DsPTP1) family protein	0
Zm00001d027471	1.79967	-1.47443		AT3G60900.1	FLA10	FASCICLIN-like arabinogalactan-protein 10	Arabinogalactan-proteins (AGPs)	FLA10
Zm00001d027520	-3.57036	3.76437		AT3G45970.1	ATEXLA1,ATEXPL1,ATHEXP BETA 2.1,EXLA1,EXPL1	expansin-like A1	Expansins	EXLA1_1
Zm00001d027710	-2.50791			AT4G26010.1	0	Peroxidase superfamily protein	Peroxidases	PRD_6
Zm00001d027803	1.44923	-1.94533		AT4G36360.1	BGAL3	beta-galactosidase 3	ß-Galactosidase	BGAL3_1
Zm00001d028331	1.4908			AT4G34480.1	0	O-Glycosyl hydrolases family 17 protein	Glycoside hydrolase family 17	GHF 17_1
Zm00001d028348	2.96209	-2.93798		AT5G06730.1	0	Peroxidase superfamily protein	Peroxidases	PRD_7
Zm00001d028709	1.29512			AT1G07890.8	APX1,ATAPX01,ATAPX1,CS1,MEE6	ascorbate peroxidase 1	Peroxidases	APX1
Zm00001d028819	-2.79593			AT3G05610.1	0	Plant invertase/pectin methylesterase inhibitor superfamily	Pectin methyl esterases	Methylesterase_2
Zm00001d029091	-3.77173			AT4G02280.1	ATSUS3,SUS3	sucrose synthase 3	0
Zm00001d029274	-1.84537	1.55617		AT1G05260.1	RCI3,RCI3A	Peroxidase superfamily protein	Peroxidases	RCI3_1
Zm00001d029913	1.5437			AT1G65680.1	ATEXPB2,ATHEXP BETA 1.4,EXPB2	expansin B2	Expansins	EXPB2_1
Zm00001d030303	2.48715	-3.01613		AT4G38660.1	0	Pathogenesis-related thaumatin superfamily protein	Receptor-like kinases	Pathogenesis-related thaumatin_1
Zm00001d031300	1.64285			AT1G55740.1	AtSIP1,SIP1	seed imbibition 1	0
Zm00001d031893	1.74317			AT5G23940.1	DCR,EMB3009,PEL3	HXXXD-type acyl-transferase family protein	Pathways of phenylpropanoid biosynthesis	DCR
Zm00001d032608	-1.46161	1.56108		AT5G08380.1	AGAL1,AtAGAL1	alpha-galactosidase 1	α-Galactosidase	AGAL1_1
Zm00001d033529	1.87759	-1.98145		AT5G03420.1	0	5\'-AMP-activated protein kinase-related	0
Zm00001d033649	1.72267			AT3G18080.1	BGLU44	B-S glucosidase 44	0
Zm00001d036158	-2.12349			AT1G14420.1	AT59	Pectate lyase family protein	Pectate and pectin Lyases	AT59
Zm00001d036900	-1.69888			AT4G32410.1	AtCESA1,CESA1,RSW1	cellulose synthase 1	Cellulose syntase genes	CESA1
Zm00001d037059	2.31801	-2.44259		AT1G10760.1	GWD,GWD1,SEX1,SOP,SOP1	Pyruvate phosphate dikinase, PEP/pyruvate binding domain	0
Zm00001d037550	1.39671			AT1G05260.1	RCI3,RCI3A	Peroxidase superfamily protein	Peroxidases	RCI3_2
Zm00001d038699	3.35079	-2.30756		AT4G35160.1	0	O-methyltransferase family protein	Pathways of phenylpropanoid biosynthesis	Methyltransferase_1
Zm00001d038703	1.6037	-1.53708		AT4G35160.1	0	O-methyltransferase family protein	Pathways of phenylpropanoid biosynthesis	Methyltransferase_2
Zm00001d038728	1.29648	-2.01907		AT1G78580.1	ATTPS1,TPS1	trehalose-6-phosphate synthase	0
Zm00001d039840	4.58376	-3.52033		AT5G48930.1	HCT	hydroxycinnamoyl-CoA shikimate/quinate hydroxycinnamoyl transferase	Pathways of phenylpropanoid biosynthesis	HCT_2
Zm00001d042143	-1.69313			AT4G16260.1	0	Glycosyl hydrolase superfamily protein	Glycoside hydrolase family 17	GHF 17_2
Zm00001d042654	1.28615			AT5G63810.1	BGAL10	beta-galactosidase 10	ß-Galactosidase	BGAL10
Zm00001d042905	1.89896			AT5G60020.1	ATLAC17,LAC17	laccase 17	Laccases	LAC17_1
Zm00001d043443	1.51046			AT2G20680.1	0	Glycosyl hydrolase superfamily protein	Glycosyl hydrolase	GHS_1
Zm00001d043465	2.06133	-1.58639		AT5G42660.1	0	Protein of unknown function (DUF616)	0
Zm00001d043477	1.24905		1.31964	AT4G18780.1	ATCESA8,CESA8,IRX1,LEW2	cellulose synthase family protein	Cellulose syntase genes	CESA8
Zm00001d043662	1.69605	-2.88593		AT1G69830.1	AMY3,ATAMY3	alpha-amylase-like 3	0
Zm00001d044182	-2.11969		-2.07199	AT1G80080.1	AtRLP17,TMM	Leucine-rich repeat (LRR) family protein	Glycosylphosphatidylinositol (GPI)-anchored proteins	RLP17
Zm00001d045043	-1.84202	2.73554		AT1G72680.1	ATCAD1,CAD1	cinnamyl-alcohol dehydrogenase	Pathways of phenylpropanoid biosynthesis	CAD1
Zm00001d045048	2.64807	-2.45874		AT2G26440.1	0	Plant invertase/pectin methylesterase inhibitor superfamily	Pectin methyl esterases	Methylesterase_3
Zm00001d045254	-1.86017			AT3G21790.1	0	UDP-Glycosyltransferase superfamily protein	Glycosyltransferase	UDP-Gl
Zm00001d046261	1.75214		2.12694	AT4G36010.2	0	Pathogenesis-related thaumatin superfamily protein	Receptor-like kinases	Pathogenesis-related thaumatin_2
Zm00001d046915	-1.92414		-1.76405	AT3G21240.1	4CL2,AT4CL2	4-coumarate:CoA ligase 2	Pathways of phenylpropanoid biosynthesis	4CL2
Zm00001d047090	1.92345	-1.77978		AT1G65680.1	ATEXPB2,ATHEXP BETA 1.4,EXPB2	expansin B2	Expansins	EXPB2_2
Zm00001d047276	1.56442			AT5G15630.1	COBL4,IRX6	COBRA-like extracellular glycosyl-phosphatidyl inositol-anchored protein family	COBRA	COBL4
Zm00001d048344	-2.41025	2.96508		AT4G38400.1	ATEXLA2,ATEXPL2,ATHEXP BETA 2.2,EXLA2,EXPL2	expansin-like A2	Expansins	EXLA2
Zm00001d048648	-1.79215			AT5G19730.1	0	Pectin lyase-like superfamily protein	Pectin methyl esterases	Methylesterase_4
Zm00001d049113	3.82325	-2.51552		AT1G29090.1	0	Cysteine proteinases superfamily protein	Proteases	Proteases_2
Zm00001d049303	3.13312			AT4G35150.1	0	O-methyltransferase family protein	Pathways of phenylpropanoid biosynthesis	Methyltransferase_3
Zm00001d050969	2.46284	-2.34489		AT4G20360.1	ATRAB8D,ATRABE1B,RABE1b	RAB GTPase homolog E1B	Endocytosis	RAB8D
Zm00001d052683	3.52477	-2.26904		AT4G35150.1	0	O-methyltransferase family protein	Pathways of phenylpropanoid biosynthesis	Methyltransferase_4
Zm00001d052684	3.25554	-2.60603		AT4G35150.1	0	O-methyltransferase family protein	Pathways of phenylpropanoid biosynthesis	Methyltransferase_5
Zm00001d052744	-1.70987			AT3G48980.1	0	Arabidopsis thaliana protein of unknown function (DUF821)	0
Zm00001d054000	-2.60762			AT3G18180.1	0	Glycosyltransferase family 61 protein	Glycosyltransferase	UDP-Gl_2
Zm00001d011444	3.98604	-2.70635		AT1G60590.1	0	Pectin lyase-like superfamily protein	Polygalacturonases	Polygalacturonases_1
Zm00001d029353	4.84298	-1.68417		AT4G35160.1	0	O-methyltransferase family protein	Pathways of phenylpropanoid biosynthesis	Methyltransferase_6
Zm00001d031022	7.31883	-7.31883		AT3G21970.1	0	Domain of unknown function (DUF26)	Receptor-like kinases	DUF26_1
Zm00001d038873	5.44699	-5.44699		AT1G15400.3	0	0	Polygalacturonases	Polygalacturonases_2
Zm00001d004687		2.86001	2.99203	AT4G35160.1	0	O-methyltransferase family protein	Pathways of phenylpropanoid biosynthesis	Methyltransferase_7
Zm00001d004768			1.88582	AT5G24318.2	0	O-Glycosyl hydrolases family 17 protein	Glycoside hydrolase family 17	GHF 17_3
Zm00001d004933			-1.48408	AT2G30933.1	0	Carbohydrate-binding X8 domain superfamily protein	Glycosylphosphatidylinositol (GPI)-anchored proteins	GPI_1
Zm00001d005775			1.64243	AT5G17420.1	ATCESA7,CESA7,IRX3,MUR10	Cellulose synthase family protein	Cellulose syntase genes	CESA7_2
Zm00001d006450			-2.41322	AT4G01070.1	GT72B1,UGT72B1	UDP-Glycosyltransferase superfamily protein	β-glucosyltransferase	UGT72B1
Zm00001d010630			1.6589	AT3G13400.1	sks13	SKU5 similar 13	SKU5	sks13
Zm00001d011757			-1.90576	AT2G42800.1	AtRLP29,RLP29	receptor like protein 29	Receptor-like kinases	RLP29
Zm00001d012748			1.33262	AT1G06410.1	ATTPS7,ATTPSA,TPS7	trehalose-phosphatase/synthase 7	Glycosyltransferase	TPS7_1
Zm00001d013672			1.64584	AT3G52060.2	0	Core-2/I-branching beta-1,6-N-acetylglucosaminyltransferase family protein	Glycosyltransferase	TPS7_2
Zm00001d025037			-2.37121	AT2G43820.1	ATSAGT1,GT,SAGT1,SGT1,UGT74F2	UDP-glucosyltransferase 74F2	0
Zm00001d014973			-1.49262	AT5G14850.1	0	Alg9-like mannosyltransferase family	0
Zm00001d018423			-1.28844	AT1G71220.2	EBS1,PSL2,UGGT	UDP-glucose:glycoprotein glucosyltransferases;transferases, transferring hexosyl groups;transferases, transferring glycosyl groups	0
Zm00001d020396			1.53122	AT1G68020.2	ATTPS6,TPS6	UDP-Glycosyltransferase / trehalose-phosphatase family protein	Glycosyltransferase	TPS6
Zm00001d022592			1.52892	AT5G48930.1	HCT	hydroxycinnamoyl-CoA shikimate/quinate hydroxycinnamoyl transferase	Pathways of phenylpropanoid biosynthesis	HCT_3
Zm00001d026460			1.37981	AT5G67230.1	I14H,IRX14-L	Nucleotide-diphospho-sugar transferases superfamily protein	Glycosyltransferase	IRX14-L
Zm00001d028211			-1.75195	AT4G00550.1	DGD2	digalactosyl diacylglycerol deficient 2	Glycosyltransferase	DGD2
Zm00001d029313			1.76972	AT3G13560.1	0	O-Glycosyl hydrolases family 17 protein	Glycoside hydrolase family 17	GHF 17_4
Zm00001d032776			1.44628	AT5G44030.1	CESA4,IRX5,NWS2	cellulose synthase A4	Cellulose syntase genes	CESA4
Zm00001d032897			1.96338	AT3G03690.1	UNE7	Core-2/I-branching beta-1,6-N-acetylglucosaminyltransferase family protein	0
Zm00001d034205			-1.70368	AT4G07960.1	ATCSLC12,CSLC12	Cellulose-synthase-like C12	Cellulose syntase Like	CSLC12
Zm00001d036240			1.90467	AT1G53290.1	0	Galactosyltransferase family protein	GT Family 31	GTF_31
Zm00001d038371			1.43582	AT5G60020.1	ATLAC17,LAC17	laccase 17	Laccases	LAC17_2
Zm00001d043238			-1.52264	AT1G05260.1	RCI3,RCI3A	Peroxidase superfamily protein	Peroxidases	RCI3_3
Zm00001d048949			2.14149	AT3G04720.1	HEL,PR-4,PR4	pathogenesis-related 4	0
Zm00001d048440			-2.05607	AT4G36360.1	BGAL3	beta-galactosidase 3	ß-Galactosidase	BGAL3_2
Zm00001d048903			1.72027	AT5G24090.1	ATCHIA,CHIA	chitinase A	Yielins	CHIA_1
Zm00001d049643			-1.82808	AT3G27330.1	0	zinc finger (C3HC4-type RING finger) family protein	0
Zm00001d003431		3.65512		AT3G05610.1	0	Plant invertase/pectin methylesterase inhibitor superfamily	Pectin methyl esterases	Methylesterase_5
Zm00001d016414		1.50256		AT2G36790.1	UGT73C6	UDP-glucosyl transferase 73C6	Glucosyl transferase	UGT73C6
Zm00001d018965		2.2369		AT5G24090.1	ATCHIA,CHIA	chitinase A	Yielins	CHIA_2
Zm00001d018966		2.9166		AT5G24090.1	ATCHIA,CHIA	chitinase A	Yielins	CHIA_3
Zm00001d020400		2.01969		AT4G37980.1	ATCAD7,CAD7,ELI3,ELI3-1	elicitor-activated gene 3-1	Pathways of phenylpropanoid biosynthesis	CAD7
Zm00001d021757		2.12036		AT3G16520.3	UGT88A1	UDP-glucosyl transferase 88A1	Glucosyl transferase	UGT88A1
Zm00001d024750		2.28134		AT1G05260.1	RCI3,RCI3A	Peroxidase superfamily protein	Peroxidases	RCI3_4
Zm00001d034069		2.13278		AT3G02100.1	0	UDP-Glycosyltransferase superfamily protein	Glycosyltransferase	UDP-Gl_3
Zm00001d040364		2.16667		AT5G66390.1	0	Peroxidase superfamily protein	Peroxidases	PRD_10
Zm00001d042739		3.33664		AT5G49690.1	0	UDP-Glycosyltransferase superfamily protein	Glycosyltransferase	UDP-Gl_4
Zm00001d043090		1.98872		AT1G55570.1	sks12	SKU5 similar 12	SKU5	sks12
Zm00001d052264		2.21399		AT1G69530.1	AT-EXP1,ATEXP1,ATEXPA1,ATHEXP ALPHA 1.2,EXP1,EXPA1	expansin A1	Expansins	EXPA1_2
Zm00001d003190		1.50827		AT3G54420.1	ATCHITIV,ATEP3,CHIV,EP3	homolog of carrot EP3-3 chitinase	0
Zm00001d003707		1.82322		AT5G66390.1	0	Peroxidase superfamily protein	Peroxidases	PRD_13
Zm00001d006397		1.52644		AT1G22360.1	AtUGT85A2,UGT85A2	UDP-glucosyl transferase 85A2	Glucosyl transferase	UGT85A2
Zm00001d006446		-2.34668		AT2G22590.1	0	UDP-Glycosyltransferase superfamily protein	Glycosyltransferase	UDP-Gl_5
Zm00001d015977		1.50514		AT5G57530.1	AtXTH12,XTH12	xyloglucan endotransglucosylase/hydrolase 12	Xyloglucan	XTH12
Zm00001d018064		1.73354		AT5G09360.1	LAC14	laccase 14	Laccases	LAC14_1
Zm00001d019163		2.21196		AT3G57520.1	AtSIP2,SIP2	seed imbibition 2	0
Zm00001d019669		1.46265		AT1G15950.1	ATCCR1,CCR1,IRX4	cinnamoyl coa reductase 1	Pathways of phenylpropanoid biosynthesis	CCR1
Zm00001d021447		-1.75242		AT2G17120.1	LYM2	lysm domain GPI-anchored protein 2 precursor	Receptor-like kinases	LYM2
Zm00001d021755		-2.16236		AT3G16520.3	UGT88A1	UDP-glucosyl transferase 88A1	Glucosyl transferase	UGT88A1
Zm00001d022085		-1.52403		AT3G08900.1	RGP,RGP3	reversibly glycosylated polypeptide 3	0
Zm00001d025067		-2.04734		AT4G13710.1	0	Pectin lyase-like superfamily protein	Pectate and pectin Lyases	Pectin lyase_2
Zm00001d027946		1.41802		AT5G48930.1	HCT	hydroxycinnamoyl-CoA shikimate/quinate hydroxycinnamoyl transferase	Pathways of phenylpropanoid biosynthesis	HCT_4
Zm00001d028825		-1.51344		AT1G30620.1	HSR8,MUR4,UXE1	NAD(P)-binding Rossmann-fold superfamily protein	Nucleotide-sugar interconversion pathways	HSR8
Zm00001d028931		-1.55621		AT2G47180.1	AtGolS1,GolS1	galactinol synthase 1	Glycosyl transferases_GT8	GolS1
Zm00001d030542		1.81844		AT5G48930.1	HCT	hydroxycinnamoyl-CoA shikimate/quinate hydroxycinnamoyl transferase	Pathways of phenylpropanoid biosynthesis	HCT_5
Zm00001d032854		1.75017		AT5G19890.1	0	Peroxidase superfamily protein	Peroxidases	PRD_14
Zm00001d034553		-1.273		AT5G05170.1	ATCESA3,ATH-B,CESA3,CEV1,IXR1	Cellulose synthase family protein	Cellulose syntase genes	CESA3
Zm00001d035865		1.60115		AT5G42830.1	0	HXXXD-type acyl-transferase family protein	Pathways of phenylpropanoid biosynthesis	Acyl-transferase_3
Zm00001d036366		1.94942		AT3G12500.1	ATHCHIB,B-CHI,CHI-B,HCHIB,PR-3,PR3	basic chitinase	0
Zm00001d037172		1.70124		AT2G03220.1	ATFT1,ATFUT1,FT1,MUR2	fucosyltransferase 1	GT Family 37	FT1
Zm00001d037383		-1.90351		AT2G18570.1	0	UDP-Glycosyltransferase superfamily protein	Glycosyltransferase	UDP-Gl_6
Zm00001d039837		-1.99515		AT5G48930.1	HCT	hydroxycinnamoyl-CoA shikimate/quinate hydroxycinnamoyl transferase	Pathways of phenylpropanoid biosynthesis	HCT_6
Zm00001d040067		1.97252		AT3G18180.1	0	Glycosyltransferase family 61 protein	Glycosyltransferase	UDP-Gl_7
Zm00001d041972		1.60384		AT2G21770.1	CESA09,CESA9	cellulose synthase A9	Cellulose syntase genes	CESA9
Zm00001d045074		-2.39666		AT4G31600.1	0	UDP-N-acetylglucosamine (UAA) transporter family	0
Zm00001d052209		1.6545		AT1G22360.1	AtUGT85A2,UGT85A2	UDP-glucosyl transferase 85A2	Glycosyltransferase	UGT85A2
Zm00001d052243		2.48834		AT5G09360.1	LAC14	laccase 14	Laccases	LAC14_2
Zm00001d052793		1.87853		AT1G78060.1	0	Glycosyl hydrolase family protein	Glycosyl hydrolase	GHS_2
